# Supplementary material
Source: Springer Nature journal article supplement (https://www.springermedizin.de/resource/supplementary/12913_2009_1138_MOESM4_ESM.pdf/9527662)
Supplement: MOESM4 [file 9527662]

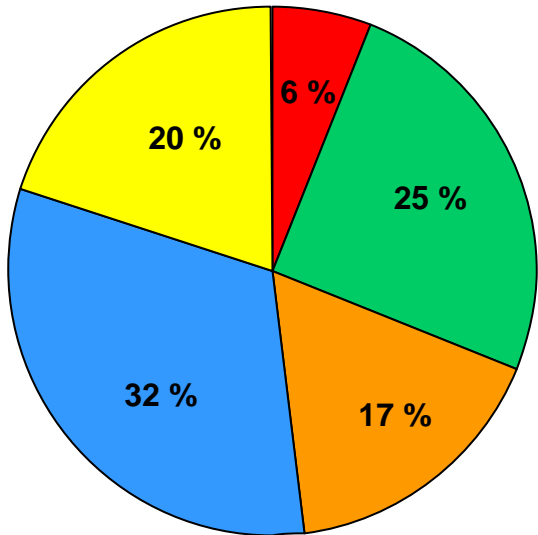

■ Incomplete CGA

■ Exchange of information

■ Assistance provided from the PHC

■ Drug administration regime

■ Other unwanted incidents
